# Supplementary material for: Myocardial Involvement Detected Using Cardiac Magnetic Resonance Imaging in Patients with Systemic Sclerosis: A Prospective Observational Study
Source: MDPI journal article supplement (doi:10.3390/jcm10225364), 2021-11-18
Supplement: s1 [file s1]

*Supplementary Materials:*

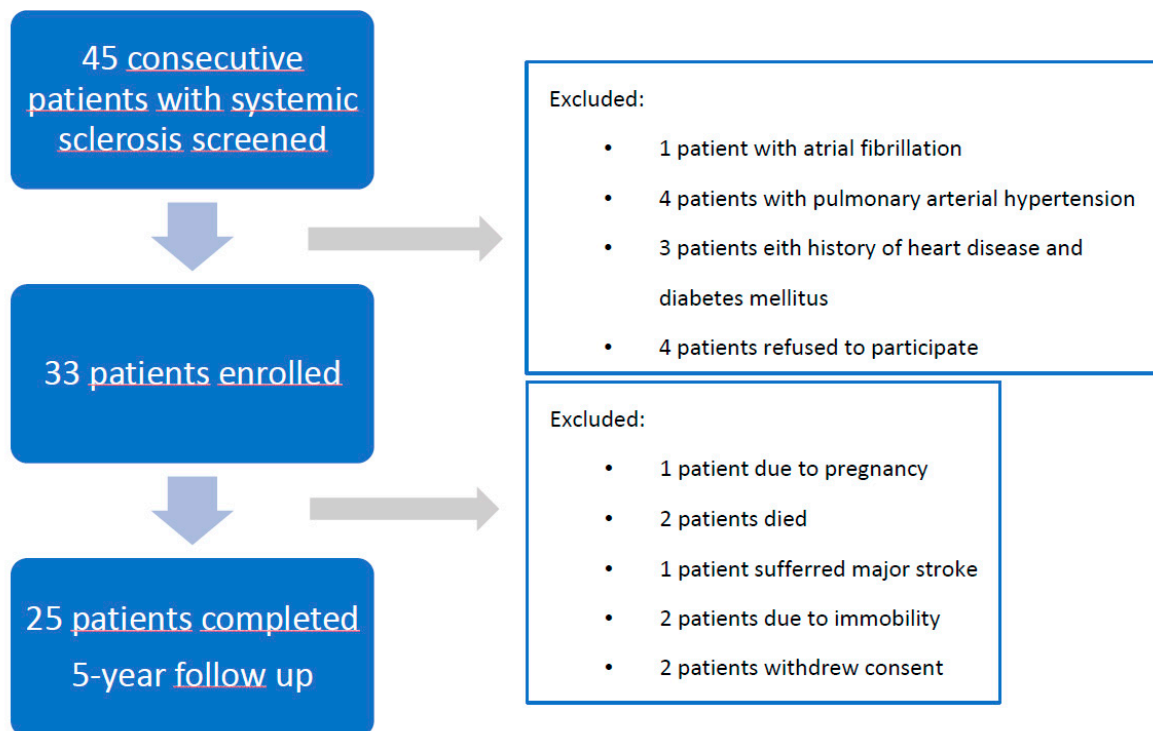

**Figure S1.** Study flow chart.

**Table S1.** Changes of selected CMR and biochemical parameters between renin-angiotensin-aldosterone blocker users and non-users over the 5-year follow-up.

| Changes in        | RAAS blockers 0<br>n = 13 | RAAS blockers 1<br>n = 12 | P             |
|-------------------|---------------------------|---------------------------|---------------|
| native T1, ms     | 4.28 ± 36.5               | -8.47 ± 46.8              | 0.30          |
| ECV, %            | 0.023 ± 0.025             | 0.005 ± 0.043             | 0.073         |
| Galectin-3, ng/mL | <b>1.35 ± 1.90</b>        | <b>-1.31 ± 2.07</b>       | <b>0.0068</b> |
| GDF 15, ng/mL     | 522.8 ± 718.5             | 221.0 ± 518.8             | 0.30          |
| sST2, ng/mL       | <b>492.37 ± 459.75</b>    | <b>82.16 ± 484.61</b>     | <b>0.015</b>  |
| hsTnI, ng/L       | <b>-2.20 ± 30.73</b>      | <b>-3.71 ± 11.01</b>      | <b>0.023</b>  |
| NT-proBNP, ng/L   | 130.30 ± 268.95           | 32.67 ± 135.25            | 0.16          |

RAAS blockers = blockers of renin-angiotensin-aldosterone system; ECV = extracellular volume; hsTnI = high sensitivity troponin I; sST2 = soluble suppression of tumourigenicity2; GDF 15 = growth differential factor 15; NT-proBNP = N-terminal pro-brain natriuretic peptide. Values are means of change (Δ)±standard deviation. P for difference between the two groups were calculated using Wilcoxon Two Sample test. P values < 0.05 are in bold.
